# Supplementary material for: An intercomparison of oceanic methane and nitrous oxide measurements
Source: Copernicus journal article supplement (doi:10.5194/bg-15-5891-2018), 2018-10-05
Supplement: Supplementary file 2 [file bg-15-5891-2018-supplement.zip]

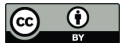

## *Supplement of*

# **An intercomparison of oceanic methane and nitrous oxide measurements**

**Samuel T. Wilson et al.**

*Correspondence to:* Samuel T. Wilson ([stwilson@hawaii.edu](mailto:stwilson@hawaii.edu))

- [bg-15-5891-2018-supplement-title-page.pdf](#)
- [SupplTable 6 CH4 methods.xlsx](#)
- [SupplTable7 N2O methods.xlsx](#)
- [SupplTable8 CH4 and N2O calculations.xlsx](#)
- [Supplement.pdf](#)

The copyright of individual parts of the supplement might differ from the CC BY 4.0 License.
