# Supplementary material for: An intercomparison of oceanic methane and nitrous oxide measurements
Source: Copernicus journal article supplement (doi:10.5194/bg-15-5891-2018), 2018-10-05
Supplement: Supplementary file 3 [file bg-15-5891-2018-supplement.zip]

Archive with 5 entries (5 files):
- SupplTable8 CH4 and N2O calculations.xlsx
- Supplement.pdf
- bg-15-5891-2018-supplement-title-page.pdf
- SupplTable7 N2O methods.xlsx
- SupplTable 6 CH4 methods.xlsx
